# Supplementary material
Source: PubMed Central journal article supplement (PMC2442528)
Supplement: pp.108.119917_1.pdf [file pp.108.119917_1.pdf]

**Supplementary table S1.** Oligonucleotides used as primers for real-time RT-PCR.

| Gene                        | Accession no.         | Primer orientation | Primer <sup>a</sup>           | Primer amount <sup>b</sup> | Amplicon size | % identity at the amino acid level with the best score (accession no.) |
|-----------------------------|-----------------------|--------------------|-------------------------------|----------------------------|---------------|------------------------------------------------------------------------|
| Pheophorbide a oxygenase    | DY261492 <sup>c</sup> | F                  | 5'-GCGACAAATGACGGTAAAAAGC-3'  | 3.6 µl                     | 103 bp        | 81% <i>Solanum lycopersicum</i> (AF321984)                             |
|                             |                       | R                  | 5'-CGTTTCTTCATCTGATGCTGCA-3'  | 3.6 µl                     |               |                                                                        |
| RCC reductase               | CX306368 <sup>e</sup> | F                  | 5'-CTCCAGCTCTCTCATCCATCG-3'   | 1.2µl                      | 104 bp        | 64% <i>Arabidopsis thaliana</i> (NM119863)                             |
|                             |                       | R                  | 5'-GTGCGGCAGAACAATTGACTTT -3' | 1.2µl                      |               |                                                                        |
| Geranylgeranyl reductase    | DY275174 <sup>e</sup> | F                  | 5'-GCGTGATTAACGGGTTAT-3'      | 3.6 µl                     | 353 bp        | 75% <i>Medicago truncatula</i> (AY960125)                              |
|                             |                       | R                  | 5'-CACTGTGCCTGTACCA-3'        | 3.6 µl                     |               |                                                                        |
| Phytoene synthase           | AF220218 <sup>d</sup> | F                  | 5'-GGTCGTCCATTTGATATGCTTG-3'  | 1.2µl                      | 111 bp        | 100% <i>Citrus unshiu PSY</i>                                          |
|                             |                       | R                  | 5'-CCTAAGGTCCATCCTCATTCCCT-3' | 0.2µl                      |               |                                                                        |
| Stay green                  | CX308230 <sup>e</sup> | F                  | 5'-CATCTTCTCCAAGGAAGCTCCCC-3  | 1.2µl                      | 101 bp        | 86% <i>Solanum lycopersicum</i> (DQ100158)                             |
|                             |                       | R                  | 5'-CCCAAACCAAAGCCTCCTGTA-3    | 1.2µl                      |               |                                                                        |
| Secretory peroxidase        | CX308252 <sup>e</sup> | F                  | 5'-GTTCTTGAGAGGTTTGCAGCCA-3   | 1.2µl                      | 101 bp        | 89% <i>Nicotiana tabacum</i> (AF149251)                                |
|                             |                       | R                  | 5'-TGCACCAGCTTCACACAATGA-3    | 1.2µl                      |               |                                                                        |
| Cysteine proteinase         | CX305503 <sup>e</sup> | F                  | 5'-CGAGAGAACTCCAAGGACCAGA-3   | 1.2µl                      | 113 bp        | 100% <i>Citrus sinensis</i> (Z47793)                                   |
|                             |                       | R                  | 5'-GCACATGCGTTCTCTTGCAA-3     | 1.2µl                      |               |                                                                        |
| Early light induced protein | CX289917 <sup>e</sup> | F                  | 5'-CATACCGAAAGCTGAGCCTCA -3'  | 1.2µl                      | 113 bp        | 80% <i>Brassica rapa</i> (AY433944)                                    |
|                             |                       | R                  | 5'-TCGCAAGCCTCCCGTTTAT-3'     | 1.2µl                      |               |                                                                        |
| Chlorophyllase              | AF160869 <sup>e</sup> | F                  | 5'-TCATCGTTGTTGCTCCTCAGC-3'   | 0.5µl                      | 69 bp         | 100% <i>Citrus sinensis CLH</i>                                        |
|                             |                       | R                  | 5'-TGCGCTGTTAAGTTCATTGG-3'    | 0.5µl                      |               |                                                                        |

<sup>a</sup>Oligonucleotides were designed using the Primer express software (Applied Biosystems). <sup>b</sup>Optimized amounts of a 5µM oligonucleotide solution. <sup>c</sup>Citrus ESTs sequences. <sup>d</sup>Citrus full length cDNA sequence (Kim et al., 2001). <sup>e</sup>Citrus full length cDNA sequence (Jacob-Wilk et al. 1999).
