# Supplementary material
Source: PubMed Central journal article supplement (PMC2442528)
Supplement: pp.108.119917_2.pdf [file pp.108.119917_2.pdf]

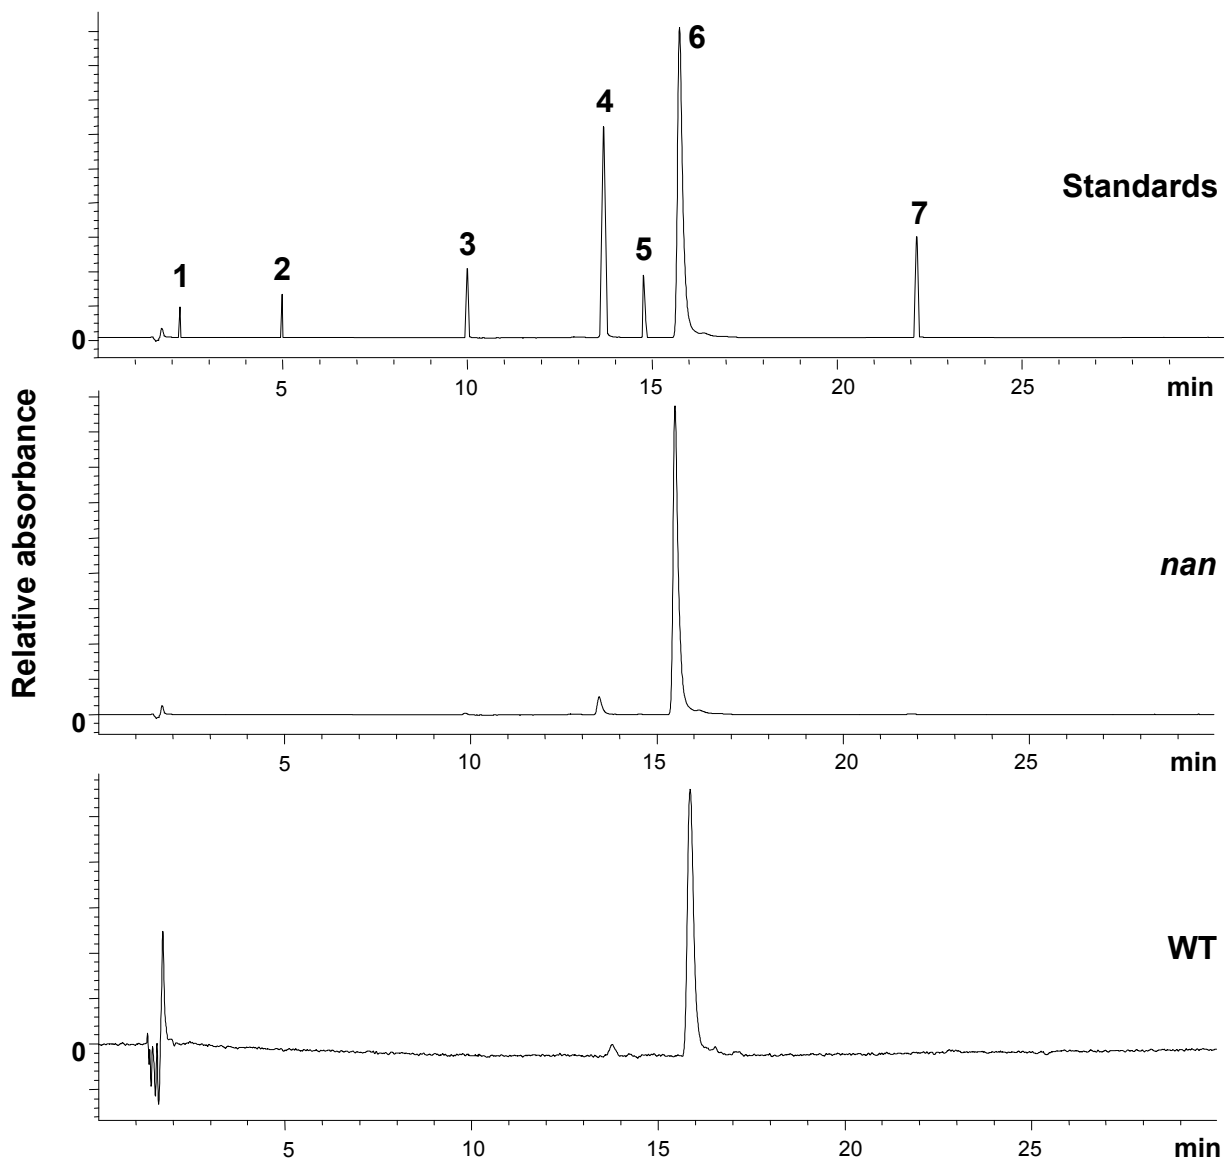

**Supplemental Figure S1.** HPLC chromatograms of chlorophylls and derivatives in WT and *nan* fruits at the ripe stage (248 DPA). Standard peaks were: 1, chlorophyllide a; 2 pheophorbide a; 3, 13<sup>2</sup>-OH chlorophyll b; 4 chlorophyll b; 5, 13<sup>2</sup> OH chlorophyll a; 6, chlorophyll a; 7, pheophytin a.
